# Supplementary material for: Forward operator for polarimetric radio occultation measurements
Source: Copernicus journal article supplement (doi:10.5194/amt-2023-132), 2023-09-01

2020-12-20-AR-case-V06-fulldrift-0.125deg

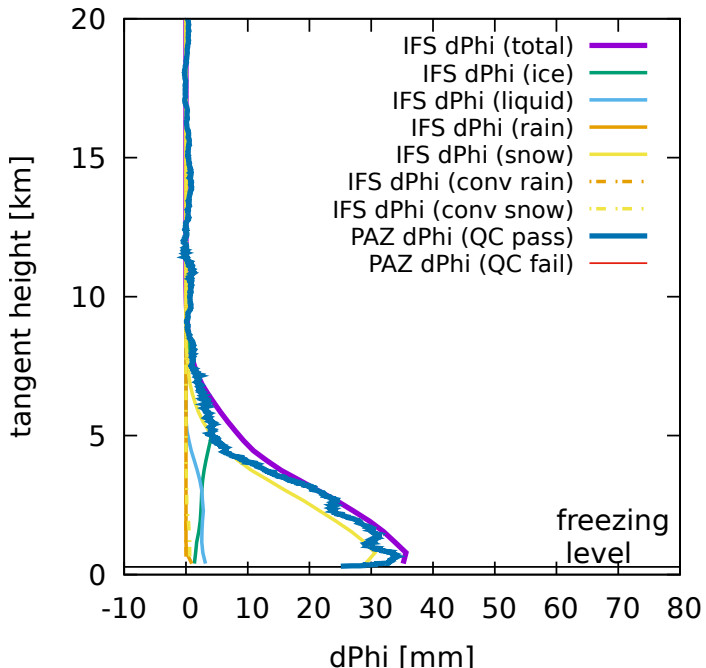

2020-12-21-AR-case-V06-fulldrift-0.125deg

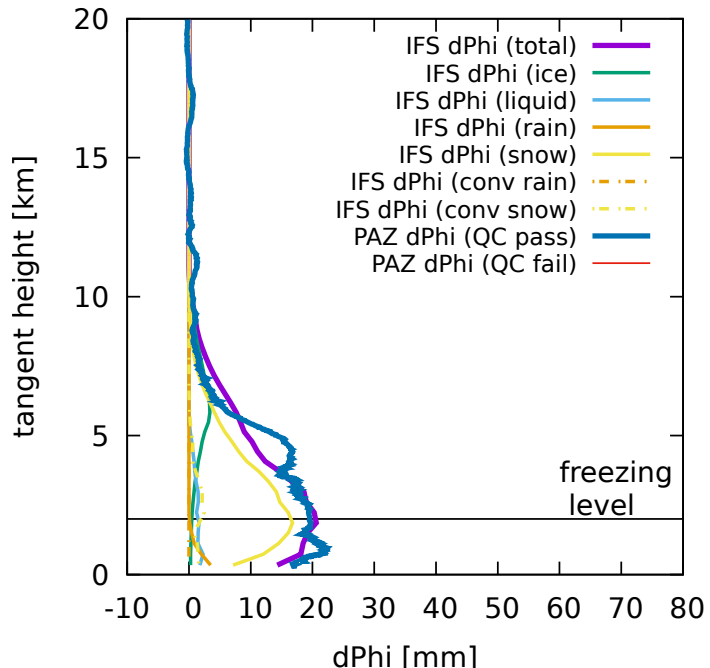

2021-01-09-AR-case-V06-fulldrift-0.125deg

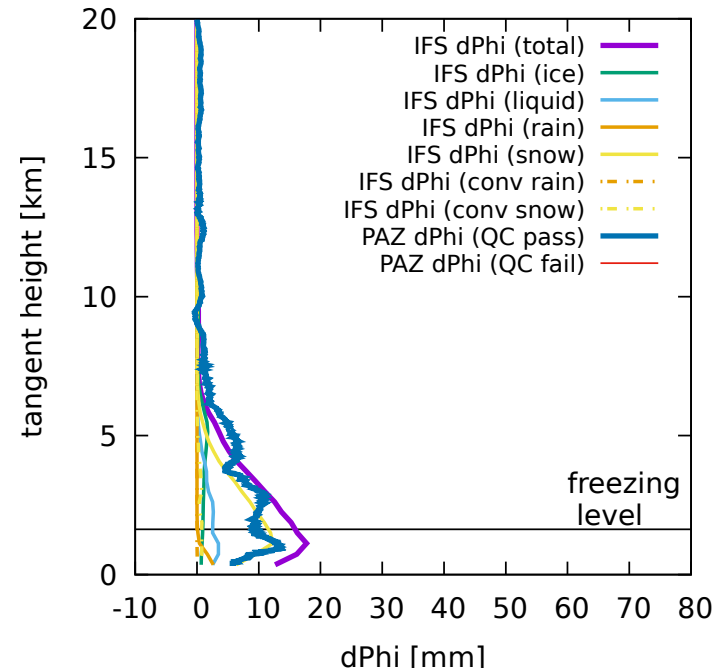

2021-01-10-AR-case-V06-fulldrift-0.125deg

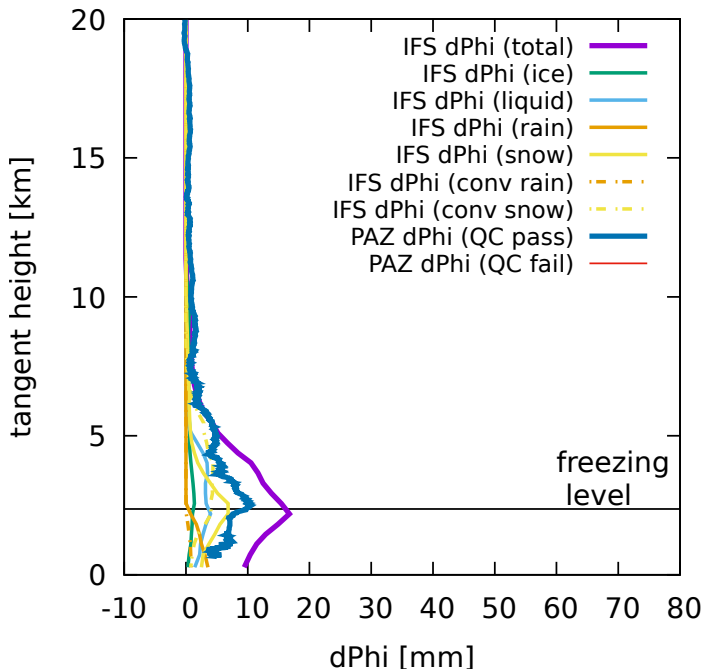

2021-01-14-AR-case-V06-fulldrift-0.125deg

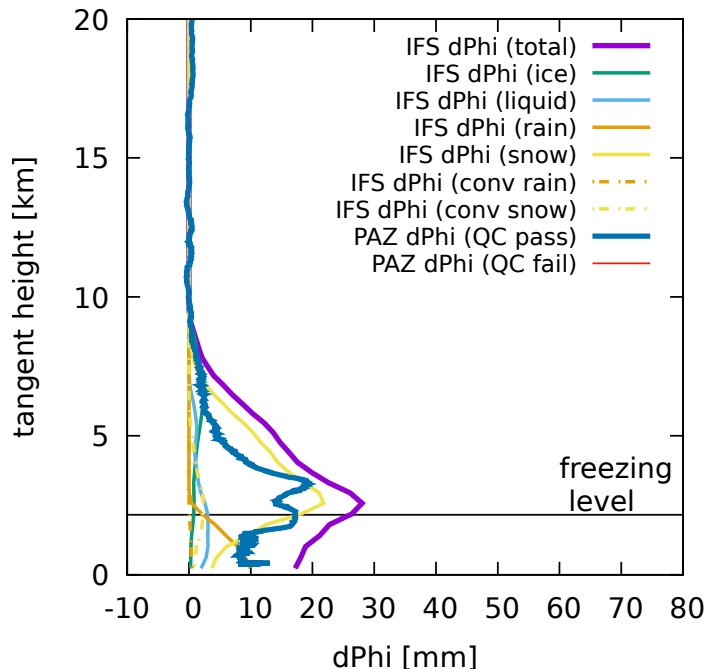

2018-05-23-MEKUNU:SAGAR-V06-fulldrift-0.125deg

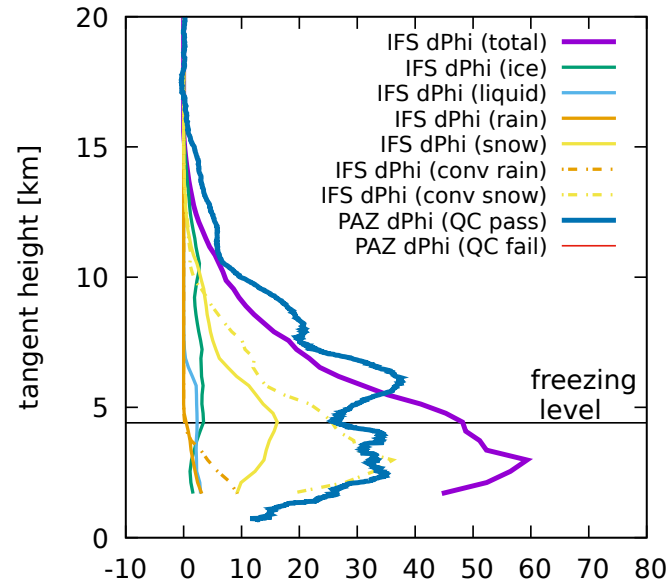

2018-10-03-LESLIE-V06-fulldrift-0.125deg

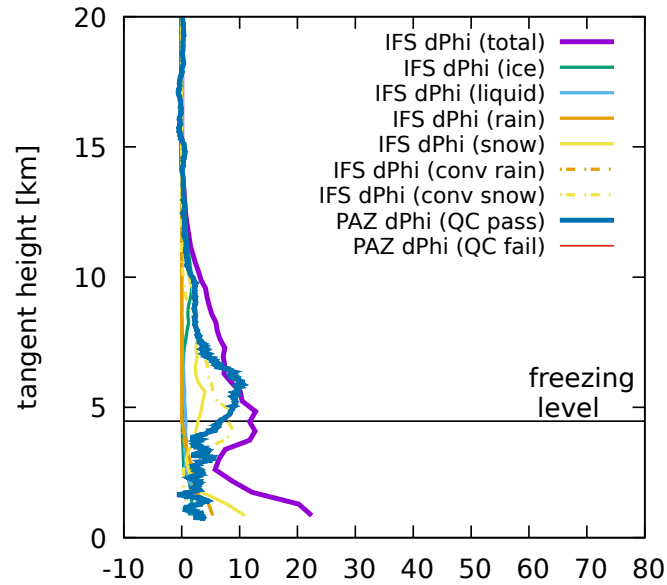

2019-10-23-BUALOI-V06-fulldrift-0.125deg

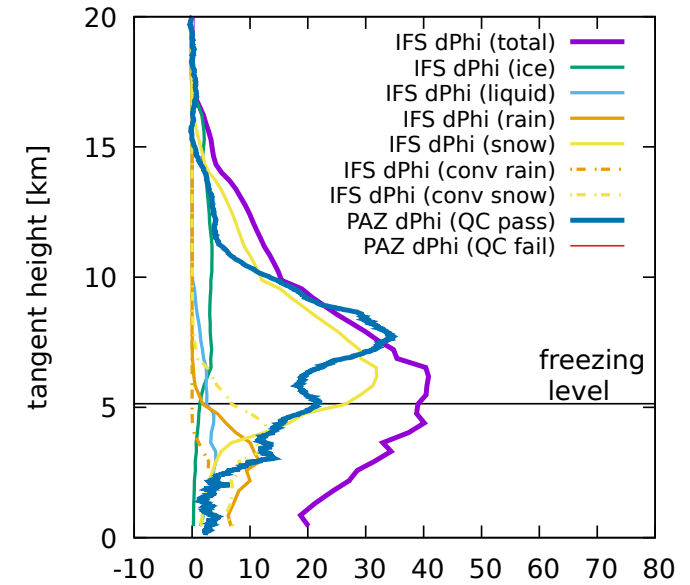

2019-10-30-MATMO-V06-fulldrift-0.125deg

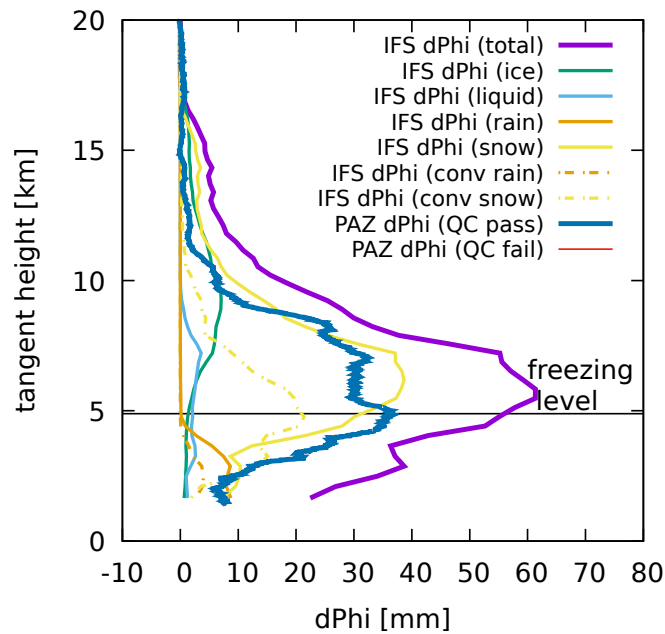

2021-09-06-LARRY-V06-fulldrift-0.125deg

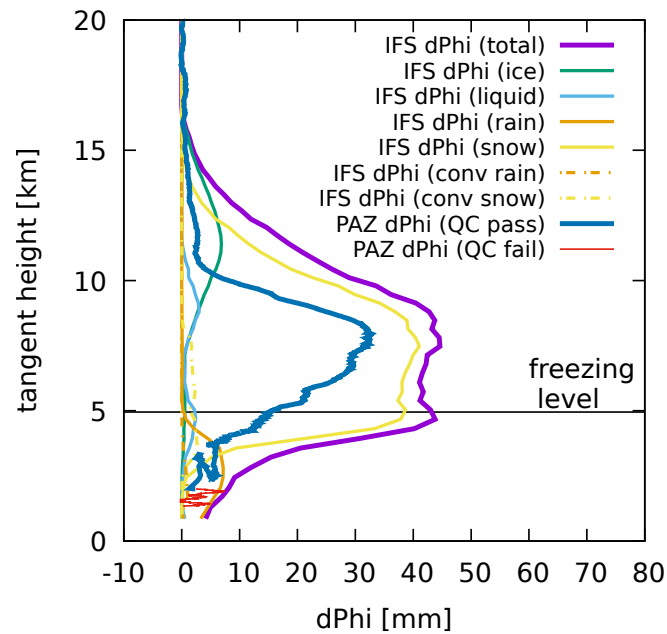

2021-10-12-KOMPASU-V06-fulldrift-0.125deg

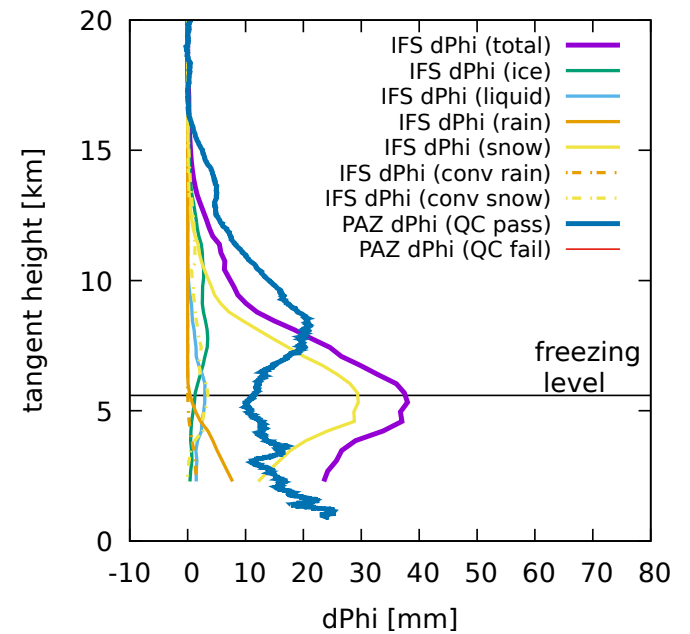

Supplement: Supplementary file [file amt-2023-132-AC1-supplement.pdf]
