# Supplementary material for: Forward operator for polarimetric radio occultation measurements
Source: Copernicus journal article supplement (doi:10.5194/amt-2023-132), 2023-09-01
Supplement: Supplementary file [file amt-2023-132-AC3-supplement.zip]

## Response to reviewer #2

Reply to the review by reviewer # 2 (Dr. Joe Turk) of **AMT-2023-132: “Forward operator for polarimetric radio occultation measurements”** by Daisuke Hotta, Katrin Lonitz, and Sean Healy

We would like to express our sincerest gratitude for spending your precious time on kindly reviewing our manuscript. Your thorough review and a number of insightful suggestions have certainly allowed us to significantly improve the manuscript.

Please find below our point-by-point responses to your comments. Your comments are cited in red colour, followed by our replies in black. For references cited in the responses below, please see the list of references provided in the revised manuscript.

For convenience, we have attached a tracked-changes version of the revised manuscript (**diff.pdf**) generated with the **latexdiff** utility; in this file, newly added and deleted texts are highlighted, respectively, with blue and red colours. Line numbers and page numbers shown in the responses below refer to those in the **diff.pdf** file.

We hope that our revision succeeded in addressing all your concerns, and thank you again for your careful assessment.

## Point-by-point responses

This manuscript nicely describes early work towards development of a forward operator for the recently developed polarimetric RO measurement. While the presentation is scientifically well presented, I have some minor comments below.

25. The ionosphere also depolarizes the GNSS carrier. Suggest to clarify, eg, “....if a large difference between horizontal and vertical phase shifts is observed (after accounting for ionospheric contributions), that indicates....”

*Response:*

Thank you for pointing this out. We revised the text to mention the need for correcting ionospheric effect (L31-33). Note that, because the sentence you suggested to modify is made in the context of ground-based weather radar for which ionospheric effect is not present, we instead modified the text which introduces PRO for the first time.

30. Also, India’s Navic GNSS system indeed operates at S-band for improved positioning, but with no dual-polarization receive capability (that I am aware of).

*Response:*

Thank you for the information. We added this information in the footnote 1 in page 2.

Section 1, general. To the less-informed reader, it’s not clear what PRO provides “in addition to” standard RO. Suggest making this clear in simpler terms. “PRO complements the standard RO profile of bending angle with a complementary measure heavy precipitation at each vertical level. This is done by measuring the phase delay at two orthogonal (horizontal and vertical) polarizations. This additional measurement provides the path-integrated specific differential phase shift at each vertical level. After inversion, a user therefore has in addition to the profile of temperature, moisture and pressure, a complementary measure of the presence of heavy precipitation along each ray path.” Or something like that... Right now, when you say, “...PRO measurements exhibit stronger signals in the presence of heavier precipitation” it is not clear what signal or measure you are referring to.

*Response:*

We agree that our original submission was insufficient in explaining the context of PRO in relation to the standard RO measurement. We thank the reviewer for pointing out this lack of background information in our introduction.

Following your suggestion, in the revised manuscript, we included a paragraph that clarifies how PRO measurement brings additional information in relation to the standard RO measurement (L41-45).

62. Slight correction: “Since RO measurements represent path-integrated quantities, a positive value of KDP is an indication of the presence of horizontally-oriented hydrometeors somewhere along the ray path”.

*Response:*

Thank you for pointing our imprecise choice of words. We corrected the text as suggested (L72-74).

125. The uncertainty in (3) also relates to the natural variability in the unknown particle size distribution (PSD). Near L-band, Kdp is more related to the mass water content (3rd moment of the PSD), unlike radar reflectivity (6th moment of the PSD). Therefore, Kdp is less sensitive to variations in the PSD and the contributions from the largest drops.

For “flat enough” ice particles, Kdp can actually larger than for (similar water content of) rain media. Since the heavy liquid phase only rain is usually concentrated in a smaller domain than the rest of the (mixed or solid) phase above, a small Kdp integrated over a long path can exceed that from a larger Kdp but integrated over a shorter path. Suggest you cite Fig 11 of Turk et al 2021 to give the reader an idea of the range of values being talked about (pasted below).

*Response:*

Thank you very much for the insightful comment that helps to justify our approach.

Following your suggestion, in the revision, we acknowledge the assumption of ignoring variability of PSD in our approach (L143-145) and also included a paragraph immediately below (L149-156) which discusses why  $K_{DP}$  is less sensitive to the precise specification of PSD than radar reflectivity is, and also why contributions from snow can exceed those from rain citing Figure 11 of Turk et al. (2019).

Discussion in Section 5.1 is also expanded to include more detail on GNSS geometry (L320-324).

138. Presumably the drop size in the IFS representation of LWC are so small, that these are essentially spherical anyhow (and hence contribute little to no to the net  $\Phi_{DP}$  ).

*Response:*

Thank you for the suggestion. We are afraid this interpretation does not apply to IFS because, in IFS, drop size distribution is not explicitly accounted for. Our forward operator abusively uses Eq (3), which is derived for solid particles, to liquid and rain as well, assuming that the parameter  $ar$  is 0.5 without using any information about droplet size.

150. Is the Geer et al formulation for converting vertical mass flux to water content specific to the IFS model, or is this a more general formulation? Readers of this manuscript may want to use this formulation with other models or reanalysis that provide vertical mass flux variables.

*Response:*

The formulation of Geer et al. (2007) is adopted in RTTOV-SCATT, which is a radiative transfer model that can be used by any NWP model not restricted to the IFS. The formulation should be applicable to any NWP model as long as vertical mass fluxes of water content are available as output. In the revision we explained this at the end of Section 2.3 (L179-181).

156. When you say, "...This configuration is essentially identical to the operational deterministic forecast", is this implying that since the simulation is done with model data so close in time to one of the operational model output time steps, that it is "essentially identical"?

*Response:*

We agree that this sentence was rather vague. What we meant here is that, first, the results can be different from the operational forecasts because of technical differences like the version of the compiler and software stack, which makes the results not identical at bit-level although there should be no significant difference at science level, and secondly, because the IFS operational suite has undergone upgrades over the period during which the examined cases happened, for some cases (actually 10 out of 11 cases) the operational forecasts have been produced from a different version of the IFS than the version used in this study. We clarified these points in the revised text (L245-248).

200. Suggest that you cite the work of Murphy et al who earlier suggested this "displacement effect" in their 2019 paper (see their discussion on observation geometry). In fact, you should cite this paper in the very beginning of this manuscript, as their work is the first study on microphysics and PRO.

M. J. Murphy, J. S. Haase, R. Padullés, S.-H. Chen, and M. A. Morris, "The Potential for Discriminating Microphysical Processes in Numerical Weather Forecasts Using Airborne Polarimetric Radio Occultations," Remote Sensing, vol. 11, no. 19, Art. no. 19, Jan. 2019, doi: 10.3390/rs11192268.

*Response:*

First of all we sincerely apologize for not being aware of the study by Murphy et al. (2019). We cited their work in the introduction (L50-53) and in Section 4.2 (L239-240) when we discuss the displacement effects.

230. I would suggest renaming this section to, "Limitations of 1D Operator". This is an important section and these limitations will magnify as model resolutions further shrink. It's important to mention that this limitation is not only valid for modeling PRO in precipitation (as you show), but in general for modeling of RO, e.g., the bending angle from the water vapor field. In areas of high pressure and fair weather (no clouds), one would expect little difference between the

bending angle simulated by the 1D and 2D operators as the horizontal water vapor field is rather homogeneous. But near clouds and precipitation, where one wants to maximize the benefit of PRO or RO observations, there are also variations in the water vapor field (eg, dry/moist across frontal boundaries) such that simulated bending angles can be quite different depending upon whether the forward operator was positioned “across” or “along” the weather front.

With a coarse model grid spacing (eg, 1-degree or so), these effects may not matter too much (?). But as model resolutions get smaller and smaller, and resolve clouds and water vapor at km scales, it is important to replicate the actual ray path viewing geometry to being simulations and observations into accord.

*Response:*

Thank you for raising this important point. We completely agree that the limitation of 1D computation also applies to the regular RO observations as well, and we also agree that this will become increasingly important as the horizontal resolution of the model gets higher. In the revised text, we emphasized this point in L288-L292.

325. Referring to “horizontally sparse observations”, if a dense sampling of PRO-like observations were to be available (each PRO viewing from a different relative azimuth angle), do you think that PRO would also be able to better correct for position errors?

*Response:*

Thank you for this great suggestion. We do agree that, if such observations are available, that will enable 4DVar to correct position errors, although at this point we can only speculate. In the revision we included brief discussion on such a possibility when we discuss future directions (L378-L380).
